# Supplementary material
Source: PubMed Central journal article supplement (PMC5167558)

# Supplementary Figure 1

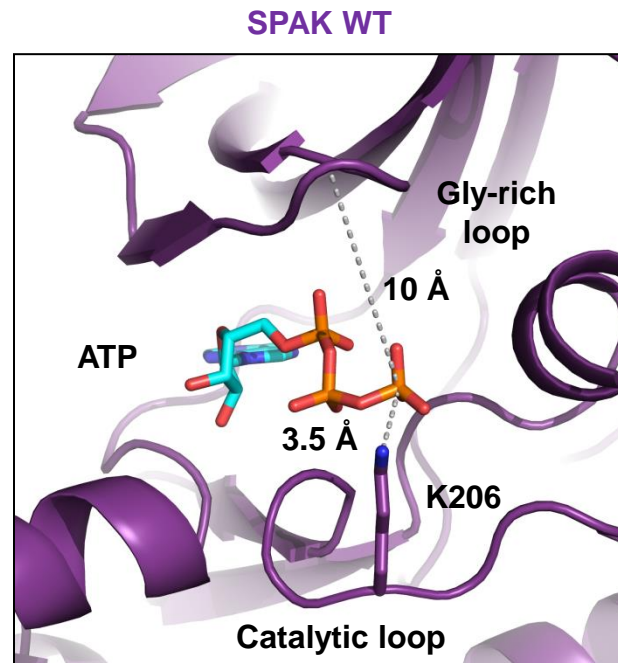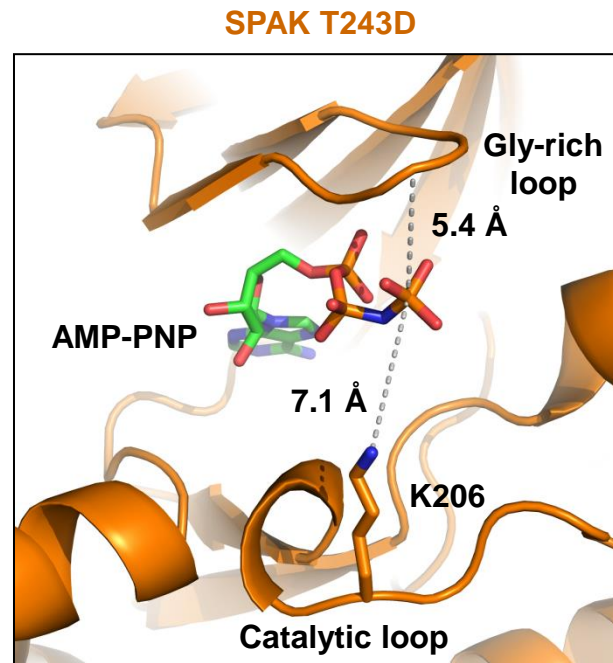



Supplementary Figure 3

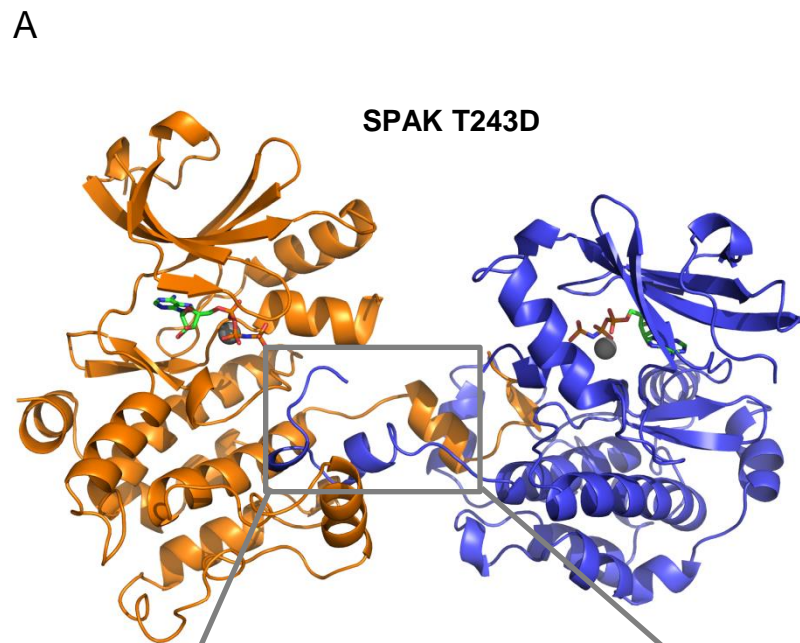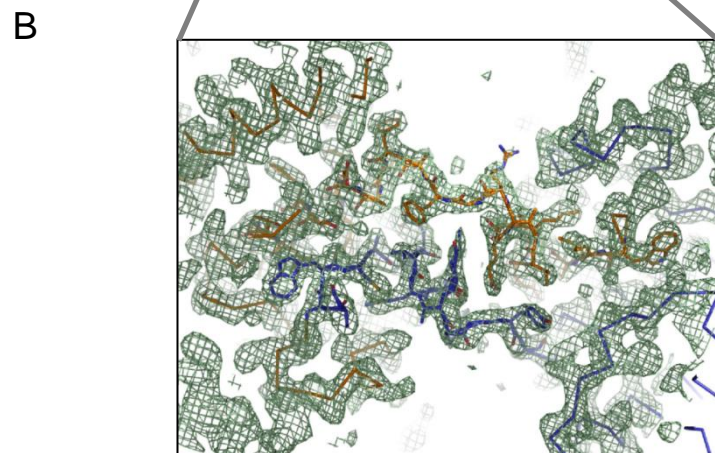

Activation loop ( $2F_o - F_c$ )

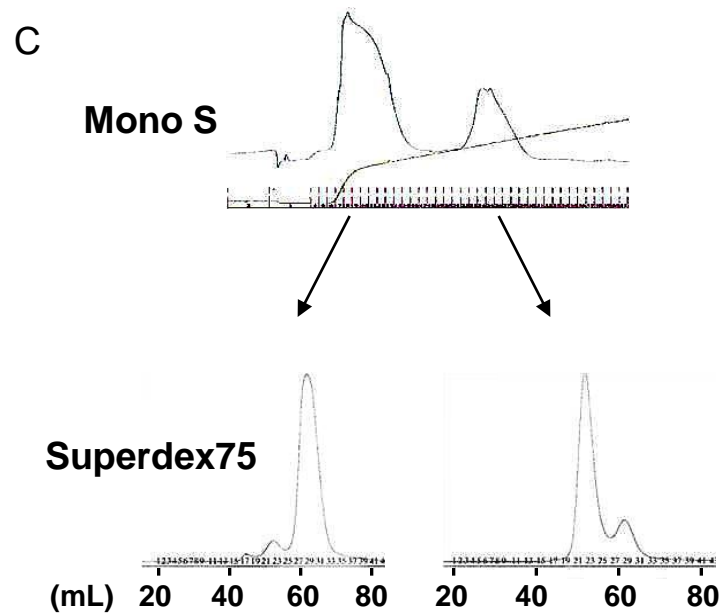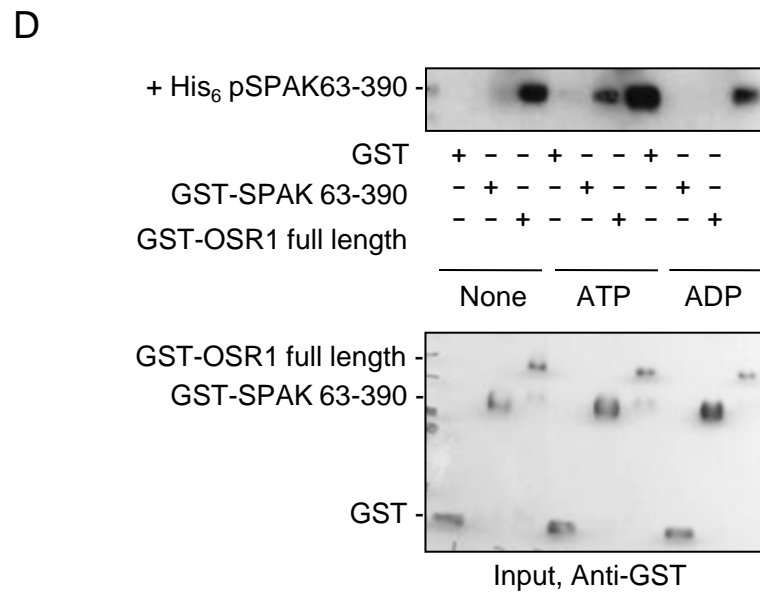

# Supplementary Figure 4

A

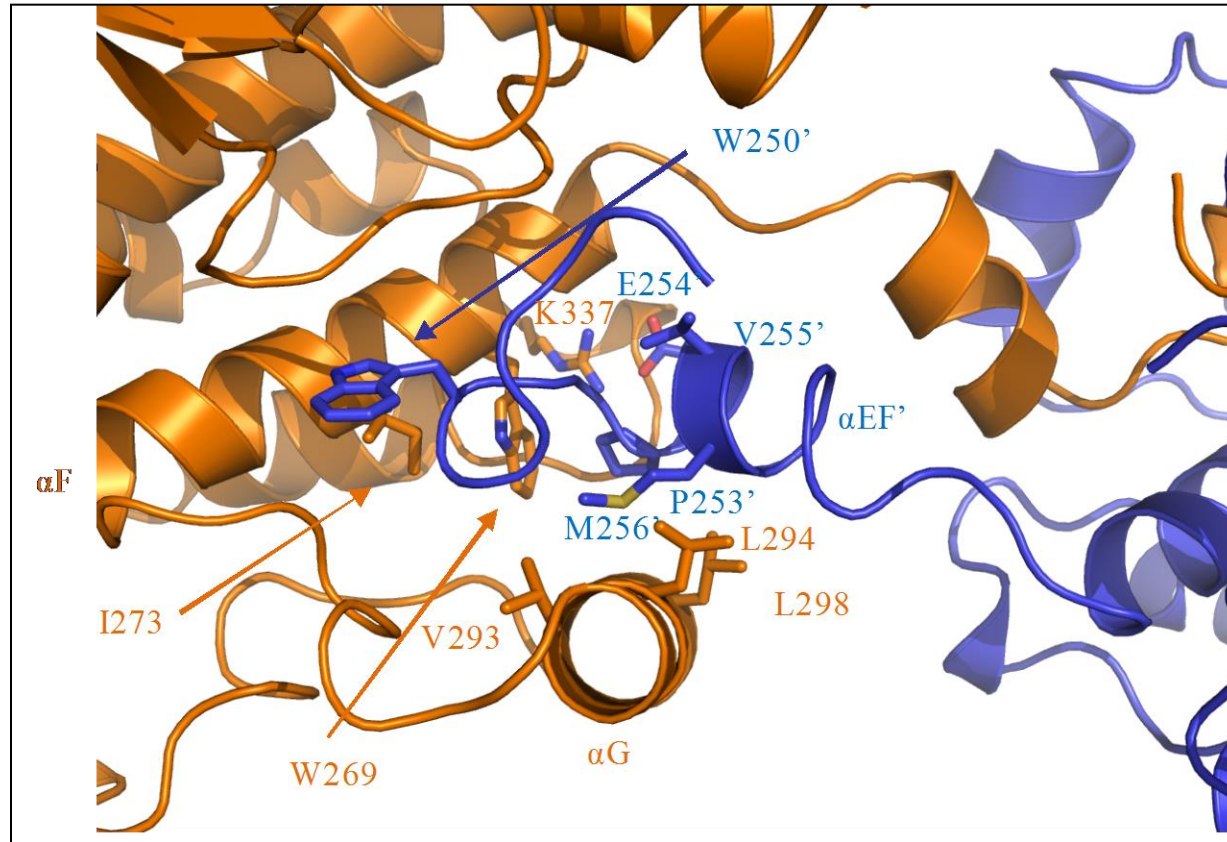

Supplementary Figure 4

B

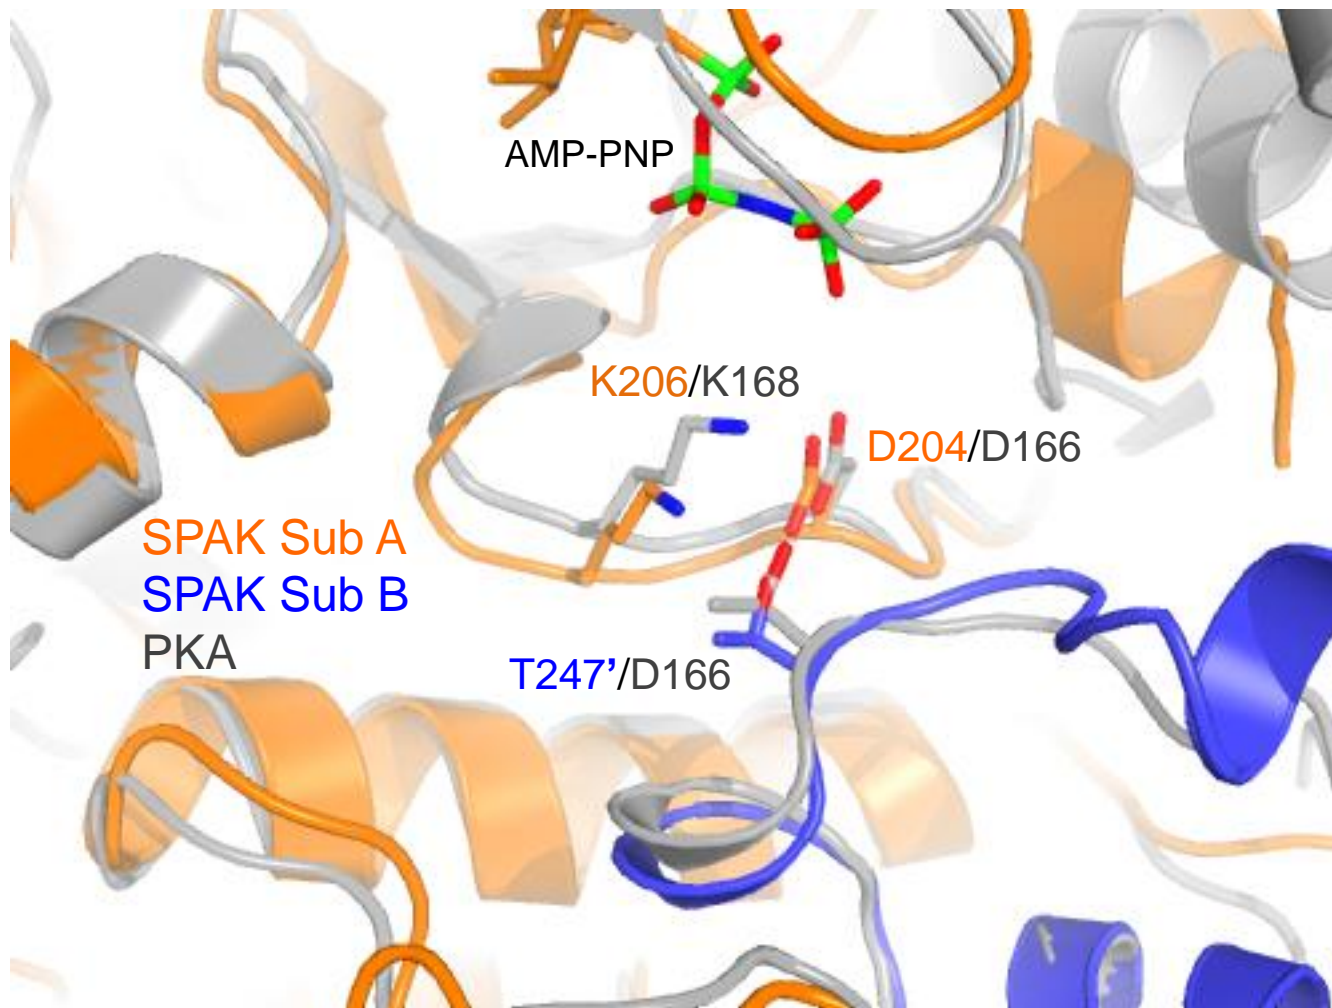



# Supplementary Figure 5

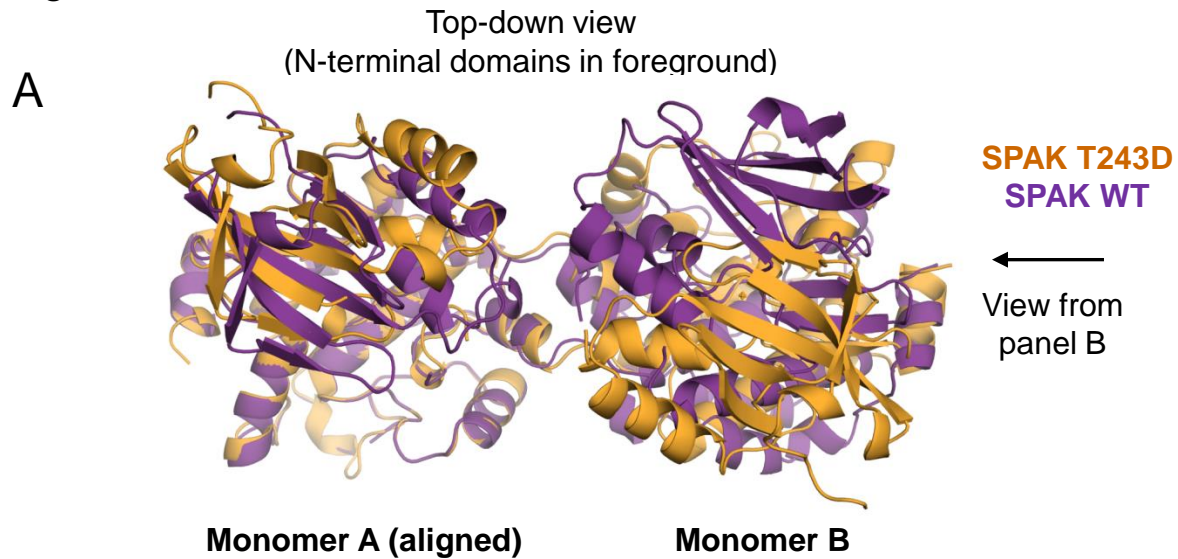

**B**

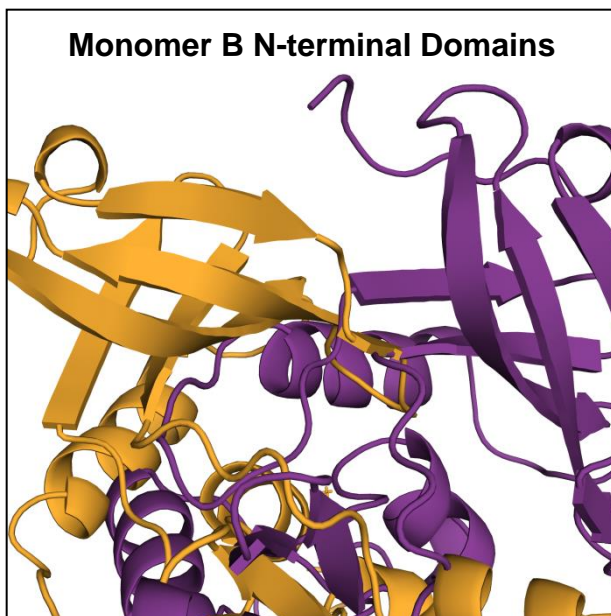

**C**

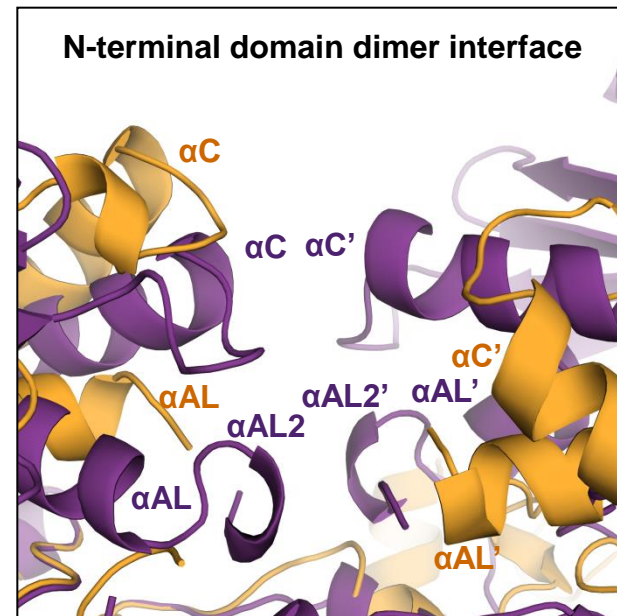

Supp  
Figure 6

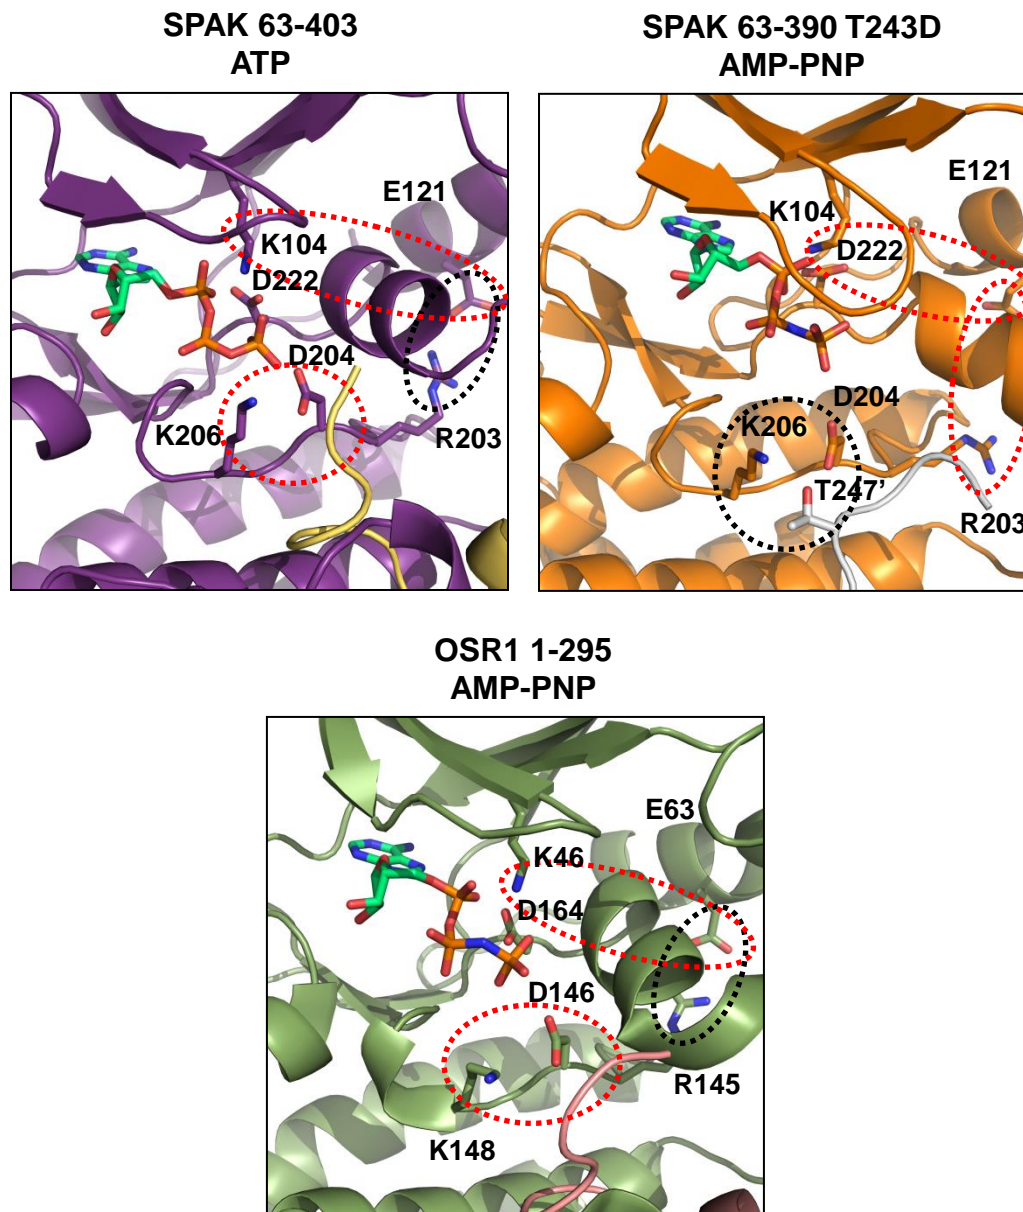

# Supplementary Figure 7

A

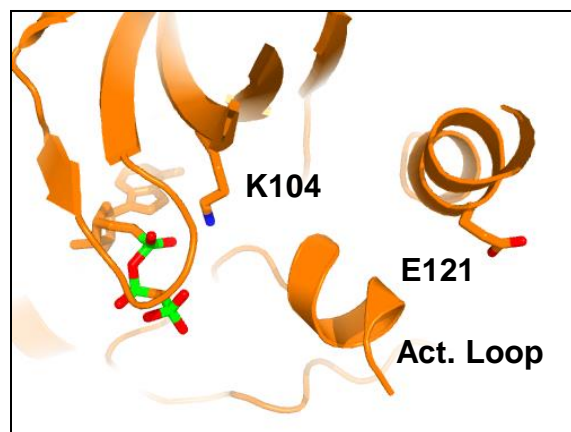

**SPAK (T243D)**

B

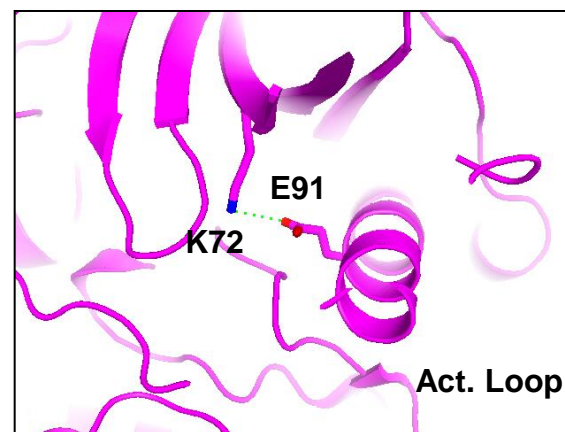

**PKA**



# Supplementary Figure 8

A

SPAK T243D  
SPAK WT  
OSR1 WT

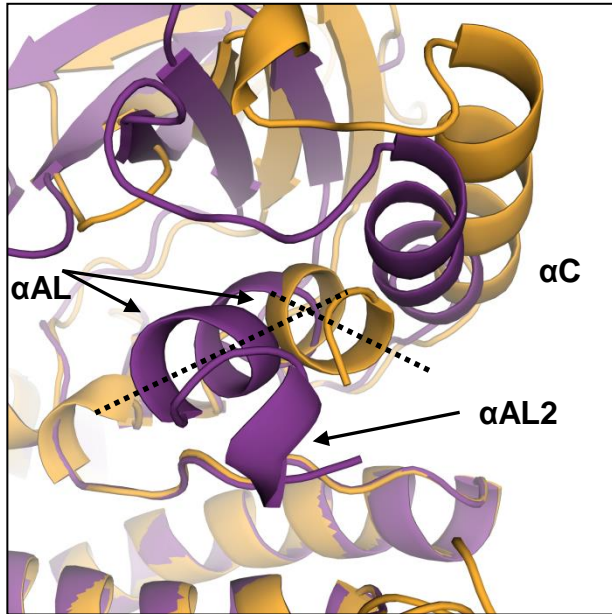

C-terminal domain alignment

B

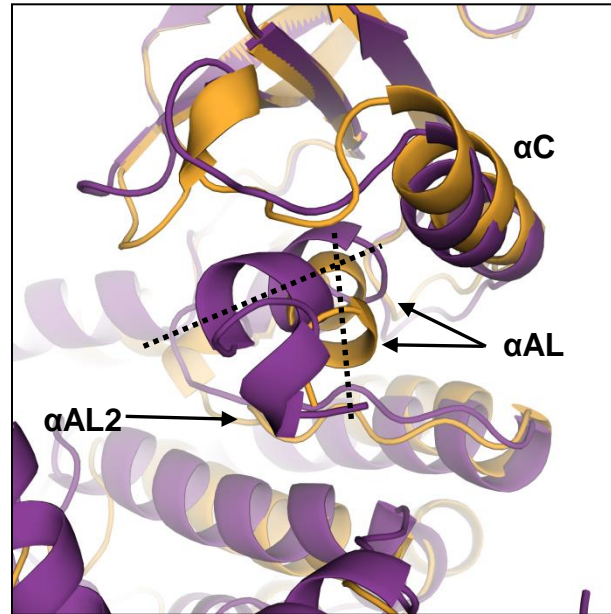

N-terminal domain alignment  
(strands  $\beta$ 1- $\beta$ 5)

# Supplementary Figure 8

C

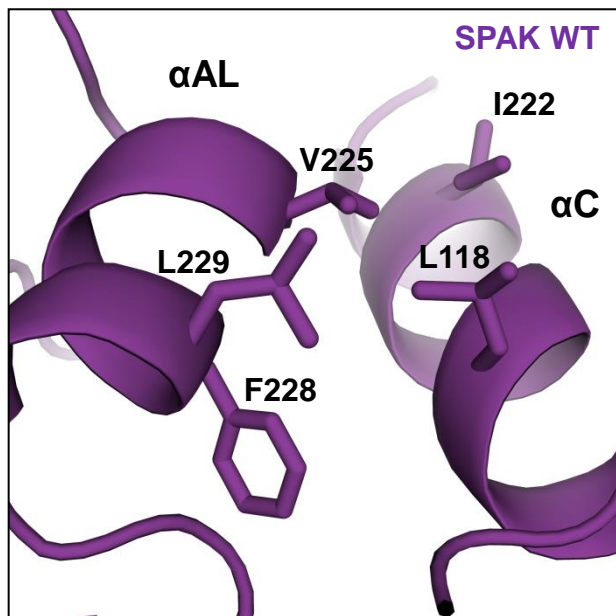

D

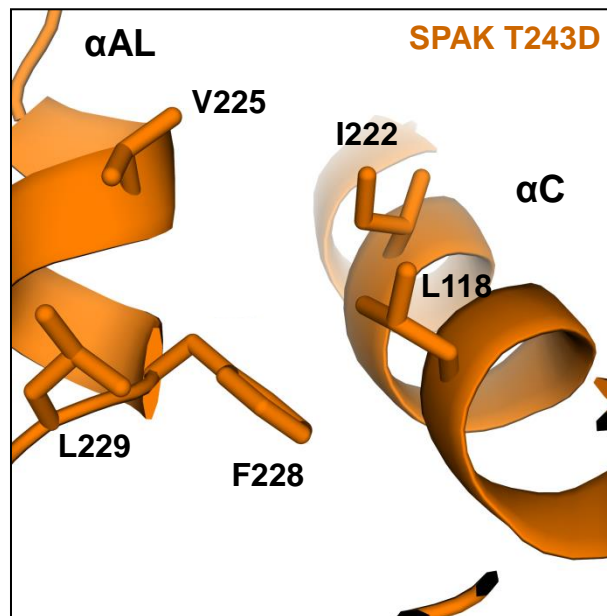

E

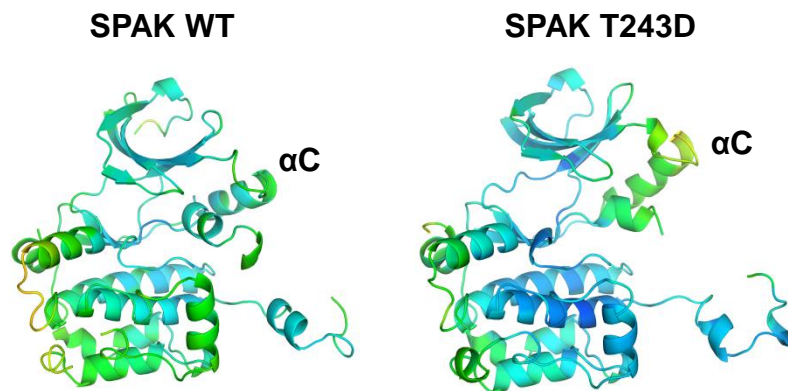

Supplementary Figure 9

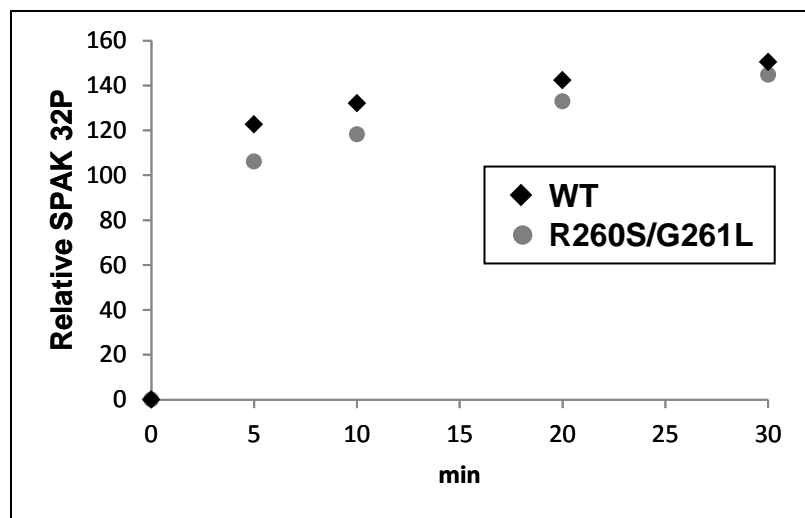

Supplement: NIHMS835569-supplement-Supp_Figs.pdf [file NIHMS835569-supplement-Supp_Figs.pdf]
